# Supplementary material for: Mitochondria supply sub-lethal signals for cytokine secretion and DNA-damage in H. pylori infection
Source: PubMed Central journal article supplement (PMC9613881; doi:10.1038/s41418-022-01009-9), 2022-05-03
Supplement: 41418_2022_1009_MOESM15_ESM.pdf [file 41418_2022_1009_MOESM15_ESM.pdf]

Section 6: Declaration of agreement. All authors, unchanged, new and removed must sign this declaration.

(NB: Please print the form, (do not sign and return) or load a scanned copy. Please note that signatures that have been inserted as an image file are acceptable as long as it is handwritten. Typed names in the signature box are unacceptable.) \* Please delete as appropriate. Delete all of the bold if you were on the original authorship list and are remaining as an author.

| 1 <sup>st</sup> author  | First name | Family name  | I agree to the proposed new authorship shown in section 4 <del>and the addition/removal* of my name to the authorship list</del> / and the proposed change in corresponding author | Signature | Date     |
|-------------------------|------------|--------------|------------------------------------------------------------------------------------------------------------------------------------------------------------------------------------|-----------|----------|
| 2 <sup>nd</sup> author  | Benz, G    | Dez. F. Nyir | I agree to the proposed new authorship shown in section 4 <del>and the addition/removal* of my name to the authorship list</del> / and the proposed change in corresponding author |           | 75.03.22 |
| 3 <sup>rd</sup> author  | M. Tarek   | Badr         | I agree to the proposed new authorship shown in section 4 <del>and the addition/removal* of my name to the authorship list</del> / and the proposed change in corresponding author |           | 14-04-22 |
| 4 <sup>th</sup> authors | Aladin     | Heimovici    | I agree to the proposed new authorship shown in section 4 <del>and the addition/removal* of my name to the authorship list</del> / and the proposed change in corresponding author |           | 16.3.22  |
| 5 <sup>th</sup> author  | Lena       | Fischer      | I agree to the proposed new authorship shown in section 4 <del>and the addition/removal* of my name to the authorship list</del> / and the proposed change in corresponding author |           | 23.04.22 |
| 6 <sup>th</sup> author  | JULIANE    | VIER         | I agree to the proposed new authorship shown in section 4 <del>and the addition/removal* of my name to the authorship list</del> / and the proposed change in corresponding author |           | 17.3.22  |
| 7 <sup>th</sup> author  | Ariana     | Metz         | I agree to the proposed new authorship shown in section 4 <del>and the addition/removal* of my name to the authorship list</del> / and the proposed change in corresponding author |           | 14.4.22  |
|                         | Bianca     | Eisele       | I agree to the proposed new authorship shown in section 4 <del>and the addition/removal* of my name to the authorship list</del> / and the proposed change in corresponding author |           | 16.3.22  |

|                         | First name | Family name | I agree to the proposed new authorship shown in section 4 /and the addition/removal* of my name to the authorship list /and the proposed change in corresponding author | Signature                                                                          | Date     |
|-------------------------|------------|-------------|-------------------------------------------------------------------------------------------------------------------------------------------------------------------------|------------------------------------------------------------------------------------|----------|
| 8 <sup>th</sup> author  | Peter      | Bronsart    | I agree to the proposed new authorship shown in section 4 /and the addition/removal* of my name to the authorship list /and the proposed change in corresponding author |  | 15.04.22 |
| 9 <sup>th</sup> author  | Konrad     | Aumann      | I agree to the proposed new authorship shown in section 4 /and the addition/removal* of my name to the authorship list /and the proposed change in corresponding author |                                                                                    |          |
| 10 <sup>th</sup> author | Jens       | Höppner     | I agree to the proposed new authorship shown in section 4 /and the addition/removal* of my name to the authorship list /and the proposed change in corresponding author |                                                                                    |          |

Please use an additional sheet if there are more than 10 authors.

**In case of author collaborations with formal agreement:**

| Representative/legal guarantor | Name of consortium/consortia | First name | Family name | Signature                                                                                                                                                               | Date |
|--------------------------------|------------------------------|------------|-------------|-------------------------------------------------------------------------------------------------------------------------------------------------------------------------|------|
|                                |                              |            |             | I agree to the proposed new authorship shown in section 4 /and the addition/removal* of my name to the authorship list /and the proposed change in corresponding author |      |

Both added/removed authors should complete the information in the first table under Section 6.

----- End of form -----

|                         | First name | Family name |                                                                                                                                                                        | Signature                                                                          | Date    |
|-------------------------|------------|-------------|------------------------------------------------------------------------------------------------------------------------------------------------------------------------|------------------------------------------------------------------------------------|---------|
| 8 <sup>th</sup> author  | Peter      | Bronsert    | I agree to the proposed new authorship shown in section 4 /and the addition/removal*of my name to the authorship list /and the proposed change in corresponding author |                                                                                    |         |
| 9 <sup>th</sup> author  | Konrad     | Lummann     | I agree to the proposed new authorship shown in section 4 /and the addition/removal*of my name to the authorship list /and the proposed change in corresponding author | 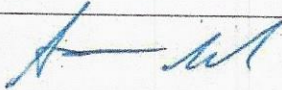 | 19.4.22 |
| 10 <sup>th</sup> author | Jens       | Höppner     | I agree to the proposed new authorship shown in section 4 /and the addition/removal*of my name to the authorship list /and the proposed change in corresponding author |                                                                                    |         |

Please use an additional sheet if there are more than 10 authors.

**In case of author collaborations with formal agreement:**

|                                | Name of consortium/consortia | First name | Family name |                                                                                                                                                                        | Signature | Date |
|--------------------------------|------------------------------|------------|-------------|------------------------------------------------------------------------------------------------------------------------------------------------------------------------|-----------|------|
| Representative/legal guarantor |                              |            |             | I agree to the proposed new authorship shown in section 4 /and the addition/removal*of my name to the authorship list /and the proposed change in corresponding author |           |      |

Both added/removed authors should complete the information in the first table under Section 6.

---- End of form ----

| 8 <sup>th</sup> author  | First name | Family name | I agree to the proposed new authorship shown in section 4 /and the addition/removal* of my name to the authorship list /and the proposed change in corresponding author | Signature           | Date    |
|-------------------------|------------|-------------|-------------------------------------------------------------------------------------------------------------------------------------------------------------------------|---------------------|---------|
| 9 <sup>th</sup> author  | Peter      | Bronsevt    | I agree to the proposed new authorship shown in section 4 /and the addition/removal* of my name to the authorship list /and the proposed change in corresponding author |                     |         |
| 10 <sup>th</sup> author | Konrad     | Aumann      | I agree to the proposed new authorship shown in section 4 /and the addition/removal* of my name to the authorship list /and the proposed change in corresponding author |                     |         |
|                         | Jens       | Höppner     | I agree to the proposed new authorship shown in section 4 /and the addition/removal* of my name to the authorship list /and the proposed change in corresponding author | <i>Jens Höppner</i> | 14.9.22 |

Please use an additional sheet if there are more than 10 authors.

**In case of author collaborations with formal agreement:**

| Representative/legal guarantor | Name of consortium/consortia | First name | Family name | Signature | Date |
|--------------------------------|------------------------------|------------|-------------|-----------|------|
|                                |                              |            |             |           |      |
|                                |                              |            |             |           |      |

Both added/removed authors should complete the information in the first table under Section 6.

----- End of form -----

## Change of authorship request form - Journals (pre-acceptance)

**Section 6: Declaration of agreement. All authors, unchanged, new and removed must sign this declaration.**

(NB: Please print the form, (docu)-sign and return/upload a scanned copy. Please note that signatures that have been inserted as an image file are acceptable as long as it is handwritten. Typed names in the signature box are unacceptable.) \* Please delete as appropriate. Delete all of the bold if you were on the original authorship list and are remaining as an author.

|                         | First name | Family name      | I agree to the proposed new authorship shown in section 4 /and the <del>addition/removal</del> *of my name to the authorship list /and the proposed change in corresponding author | Signature                                                                           | Date     |
|-------------------------|------------|------------------|------------------------------------------------------------------------------------------------------------------------------------------------------------------------------------|-------------------------------------------------------------------------------------|----------|
| 1 <sup>st</sup> author  | Collins    | Waguija Kontchou | I agree to the proposed new authorship shown in section 4 /and the <del>addition/removal</del> *of my name to the authorship list /and the proposed change in corresponding author |    | 16.03.22 |
| 2 <sup>nd</sup> author  | Ishita     | Pavui            | I agree to the proposed new authorship shown in section 4 /and the <del>addition/removal</del> *of my name to the authorship list /and the proposed change in corresponding author |    | 17.03.22 |
| 3 <sup>rd</sup> author  | Anim       | Weber            | I agree to the proposed new authorship shown in section 4 /and the <del>addition/removal</del> *of my name to the authorship list /and the proposed change in corresponding author |   | 17.3.22  |
| 4 <sup>th</sup> authors | SUSANNE    | KIRSCHNER        | I agree to the proposed new authorship shown in section 4 /and the <del>addition/removal</del> *of my name to the authorship list /and the proposed change in corresponding author |  | 11.7.22  |
| 5 <sup>th</sup> author  | Georg      | Häcker           | I agree to the proposed new authorship shown in section 4 /and the <del>addition/removal</del> *of my name to the authorship list /and the proposed change in corresponding author |  | 21.3.22  |
| 6 <sup>th</sup> author  |            |                  | I agree to the proposed new authorship shown in section 4 /and the <del>addition/removal</del> *of my name to the authorship list /and the proposed change in corresponding author |                                                                                     |          |
| 7 <sup>th</sup> author  |            |                  | I agree to the proposed new authorship shown in section 4 /and the <del>addition/removal</del> *of my name to the authorship list /and the proposed change in corresponding author |                                                                                     |          |
